# Supplementary material for: Identification of QTLs and Putative Candidate Gene Involved in Rhizome Enlargement of Asian lotus (Nelumbo Nucifera)
Source: Research Square preprint supplement (doi:10.21203/rs.3.rs-937813/v1), 2022-01-06
Supplement: Supplementary file 1 [file 8dce10794e930ec578cf8870.docx]

Table S4 ANOVA analysis of phenotypic traits in the three climatic years.

| Trait | Source | Mean squre | | F value | P value |
| --- | --- | --- | --- | --- | --- |
| Number of enlarged rhizome | Genotype (G) | 4.96 | 225.81 | | <0.001 |
| (NER) | Environment (E) | 7.1 | 323.17 | | <0.001 |
|  | G X E | 0.32 | 14.83 | | <0.001 |
| Maximum diameter of rhizome | Genotype (G) | 3.23 | 21.62 | | <0.001 |
| (MDR) | Environment (E) | 5.73 | 38.26 | | <0.001 |
|  | G X E | 0.27 | 1.83 | | <0.001 |
| Length of enlarged rhizome | Genotype (G) | 40.436 | 3.96 | | <0.001 |
| (LER) | Environment (E) | 452.32 | 44.25 | | <0.001 |
|  | G X E | 28.37 | 2.78 | | <0.001 |
| Rhizome enlargement Index | Genotype (G) | 0.0633 | 74.92 | | <0.001 |
| (REI) | Environment (E) | 0.0416 | 49.25 | | <0.001 |
|  | G X E | 0.0088 | 10.41 | | <0.001 |
